# Supplementary material for: Prognostic value of inflammation-based indices in patients with resected hepatocellular carcinoma
Source: Springer Nature journal article supplement (doi:10.1186/s12885-021-08153-4), 2021-04-27

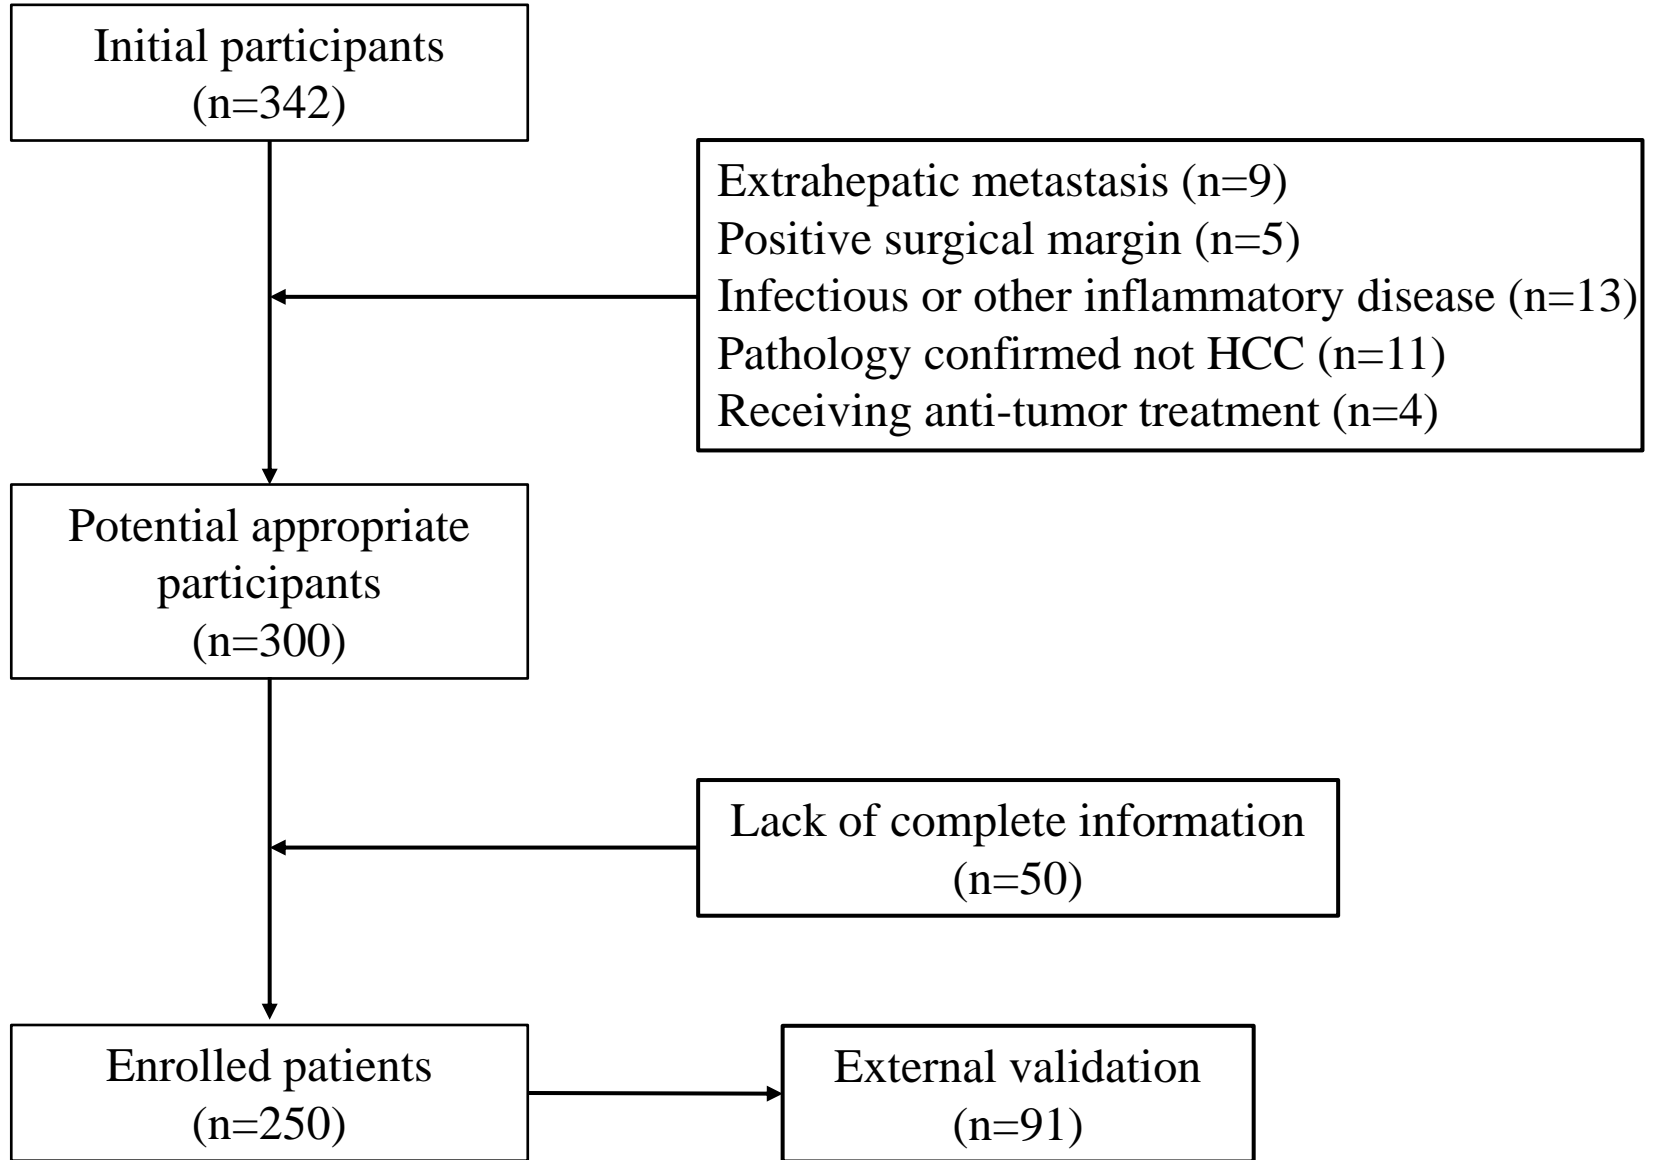

Supplement: MOESM1 [file 19110696]
